# Supplementary material for: Synthesis and physicochemical characterization of (6S)-5-formiminotetrahydrofolate; a reference standard for metabolomics
Source: Royal Society of Chemistry journal article supplement (doi:10.1039/c8ob00245b), 2018-01-01
Supplement: c8ob00245b11.pdf [file c8ob00245b11.pdf]

**The title for Supplemental Scheme 1**

Suppl. Scheme 1: Reaction of 6-(3,4-dimethoxyphenyl)-1,4-diaminohexa-2,5-diene with Ethyl Formimidate and Base Hydrolysis of Acanthoine

**The titles for Supplemental Figures 1 through 3 are listed below:**

Suppl. Fig 1: Time Course of Acid Promoted Conversion of 5-Formiminotetrahydrofolate (2) to 5,10-Methenyltetrahydrofolate (4)

Suppl. Fig 2: Beer's Law Dose-Response Correlation for 5,10-Methenyltetrahydrofolate (4) Hydrochloride

Suppl. Fig 3: UV Spectra from UPLC/UV Analysis of Ampouled 2  
(A) Representative spectrum for (6S)-5-Formiminotetrahydrofolate (2); (B) Representative spectrum for (6RS)-5,10-Methenyltetrahydrofolate (4)

**The titles for Supplemental Figures 4 through 8 (showing the solvents) are listed below:**

Suppl. Fig 4:  $^1\text{H}$  NMR Spectrum of 5-Formiminotetrahydrofolate in Deuterated Dimethylsulfoxide

Suppl. Fig 5:  $^1\text{H}$  NMR Spectrum of 5-Formyltetrahydrofolate in Deuterated Water

Suppl. Fig 6:  $^1\text{H}$  NMR Spectrum of 10-Formyltetrahydrofolate in Deuterated Water

Suppl. Fig 7:  $^1\text{H}$  NMR Spectrum of 5-Formyltetrahydrofolate in Deuterated Dimethylsulfoxide

Suppl. Fig 8:  $^1\text{H}$  NMR Spectrum of 5-Formyltetrahydrofolate in Deuterated Dimethylsulfoxide + 5 Drops Deuterated Water
