# Supplementary figures and images for: Synthesis and physicochemical characterization of (6S)-5-formiminotetrahydrofolate; a reference standard for metabolomics
Source: Royal Society of Chemistry journal article supplement (doi:10.1039/c8ob00245b), 2018-01-01

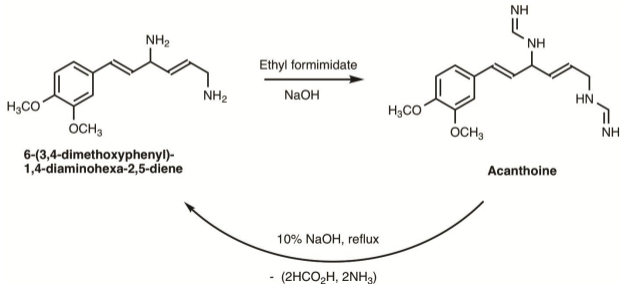

Supplement: c8ob00245b10.pdf [file c8ob00245b10.pdf]

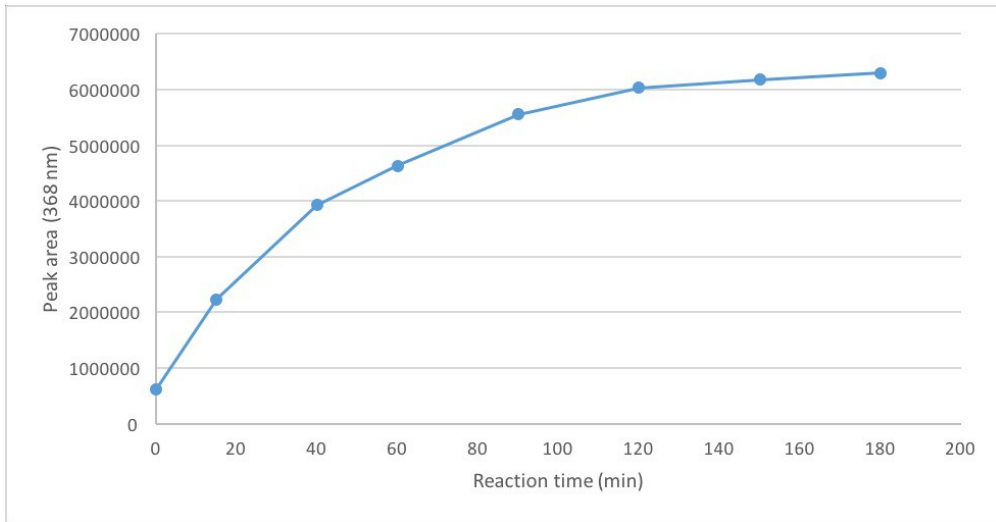

Supplement: c8ob00245b2.pdf [file c8ob00245b2.pdf]

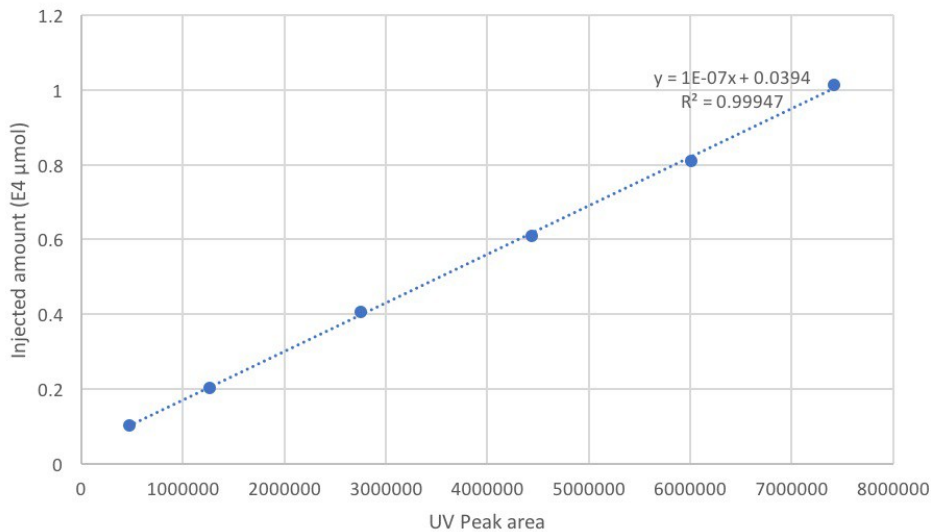

Supplement: c8ob00245b3.pdf [file c8ob00245b3.pdf]

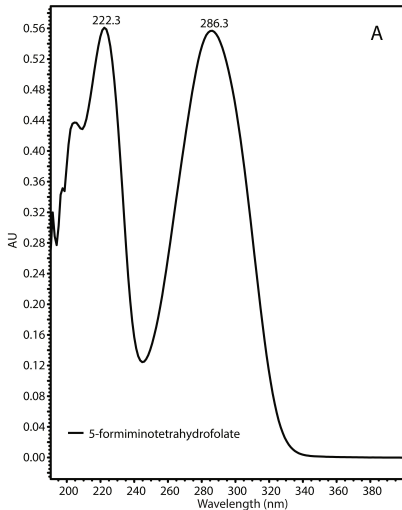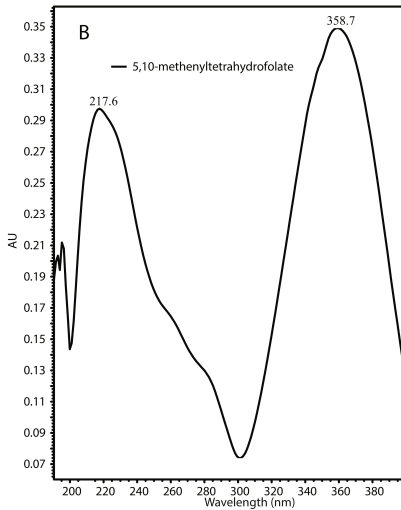

Supplement: c8ob00245b4.pdf [file c8ob00245b4.pdf]

Calcium folinate (3 mg)

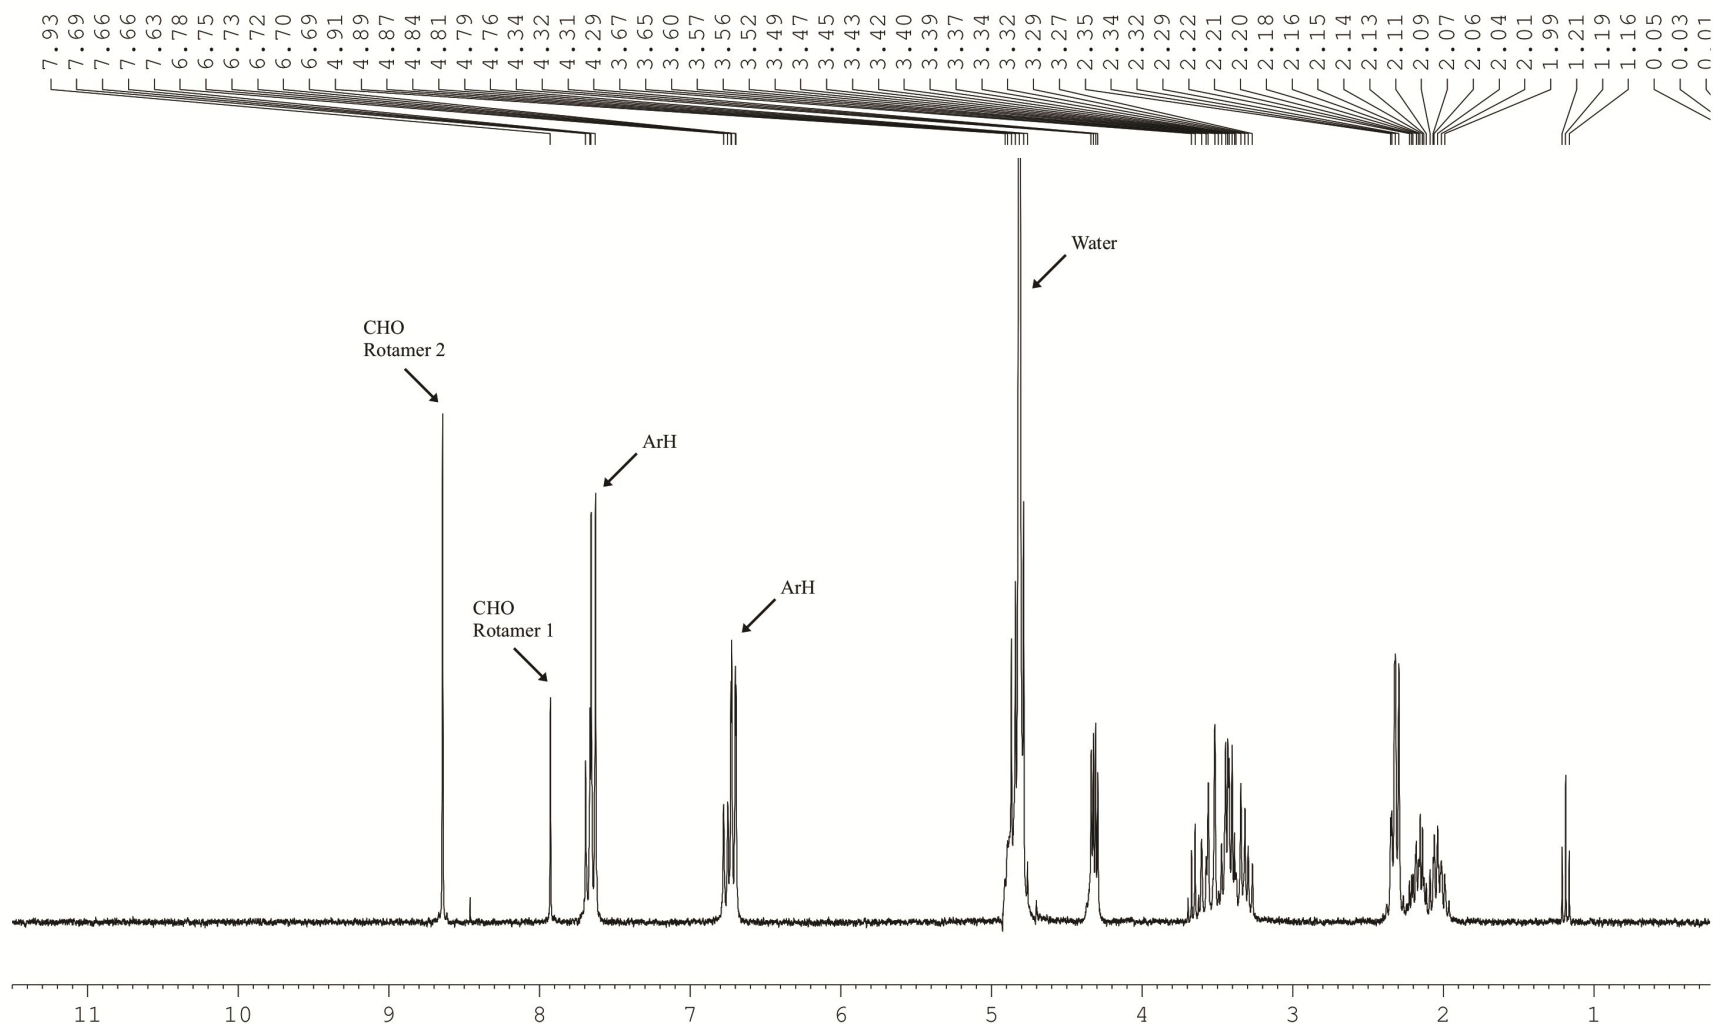

Supplement: c8ob00245b6.pdf [file c8ob00245b6.pdf]
